# Supplementary material for: Body shape index: Sex-specific differences in predictive power for all-cause mortality in the Japanese population
Source: PubMed Central journal article supplement (PMC5433760; doi:10.1371/journal.pone.0177779), 2017-05-16
Supplement: pone.0177779.s001.pdf [file pone.0177779.s001.pdf]

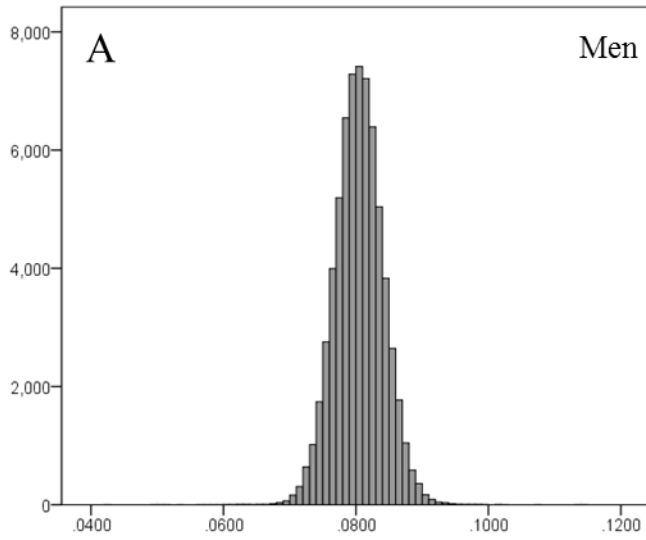

A Body Shape Index

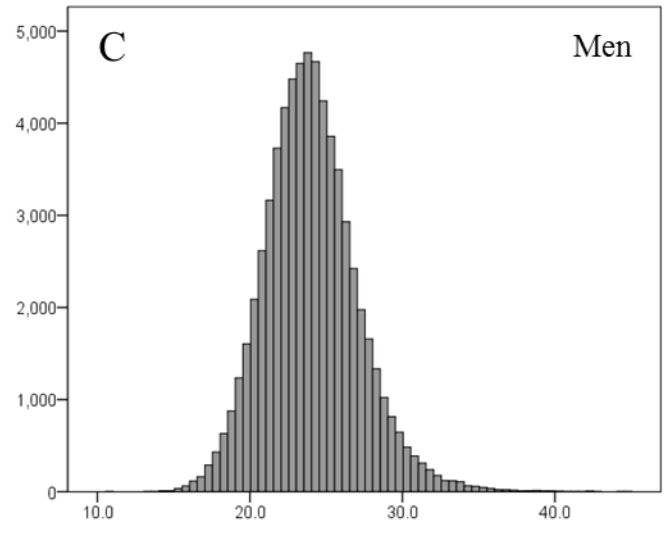

Body Mass Index, kg/m<sup>2</sup>

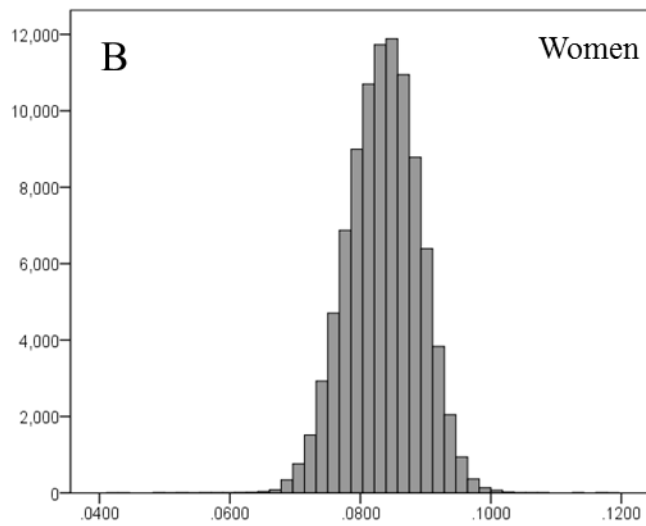

A Body Shape Index

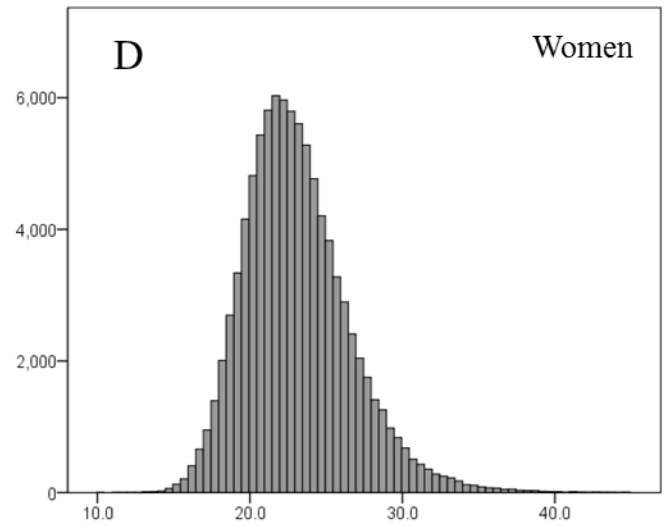

Body Mass Index, kg/m<sup>2</sup>

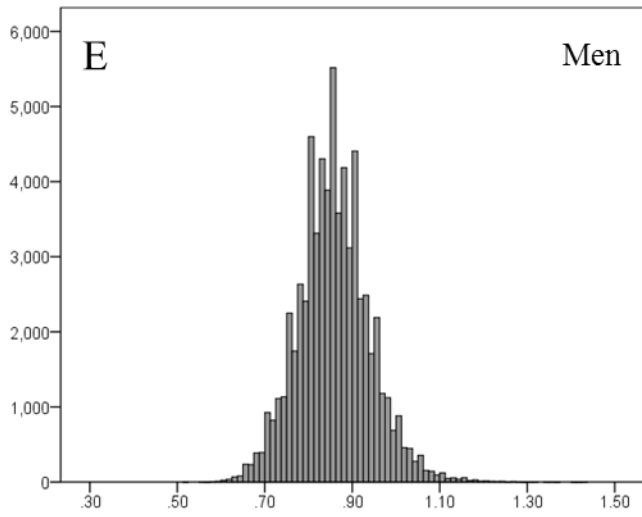

Waist Circumference, meters

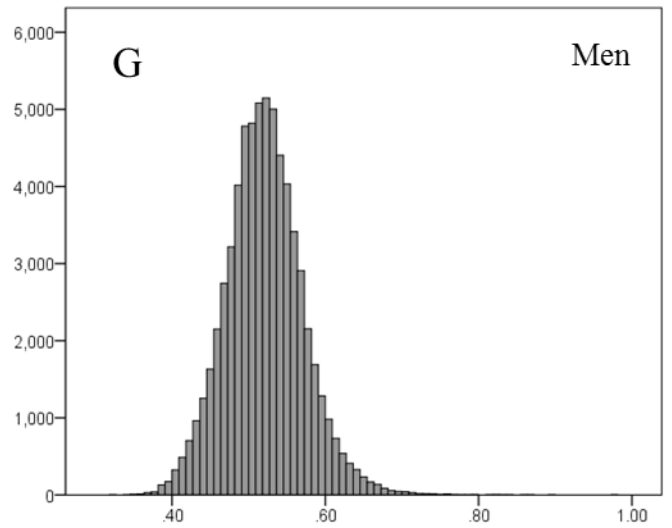

Waist-to-Height Ratio

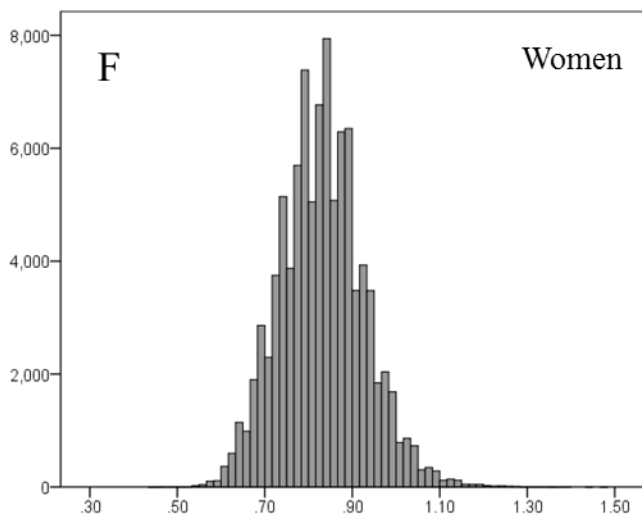

Waist Circumference, meters

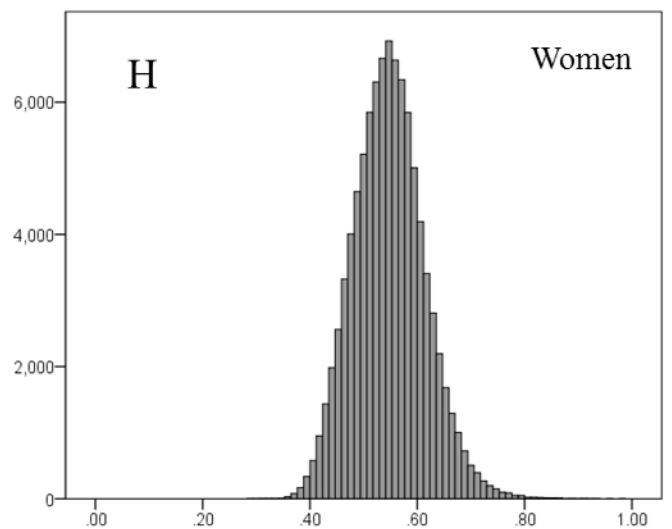

Waist-to-Height Ratio
