# Supplementary material for: Body shape index: Sex-specific differences in predictive power for all-cause mortality in the Japanese population
Source: PubMed Central journal article supplement (PMC5433760; doi:10.1371/journal.pone.0177779), 2017-05-16

**A**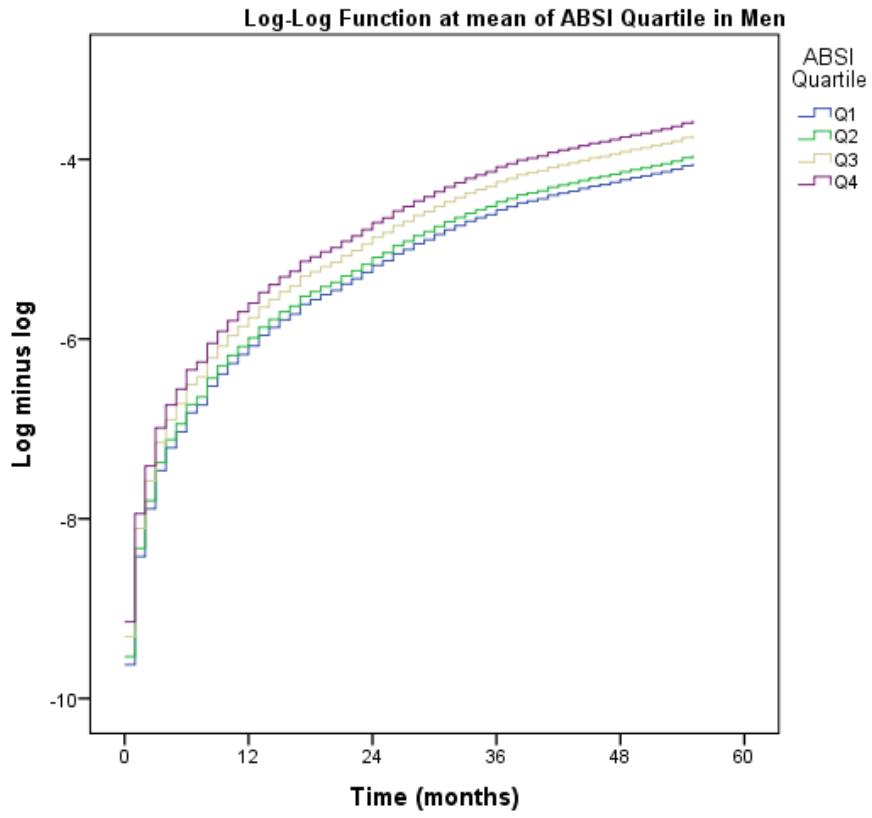**B**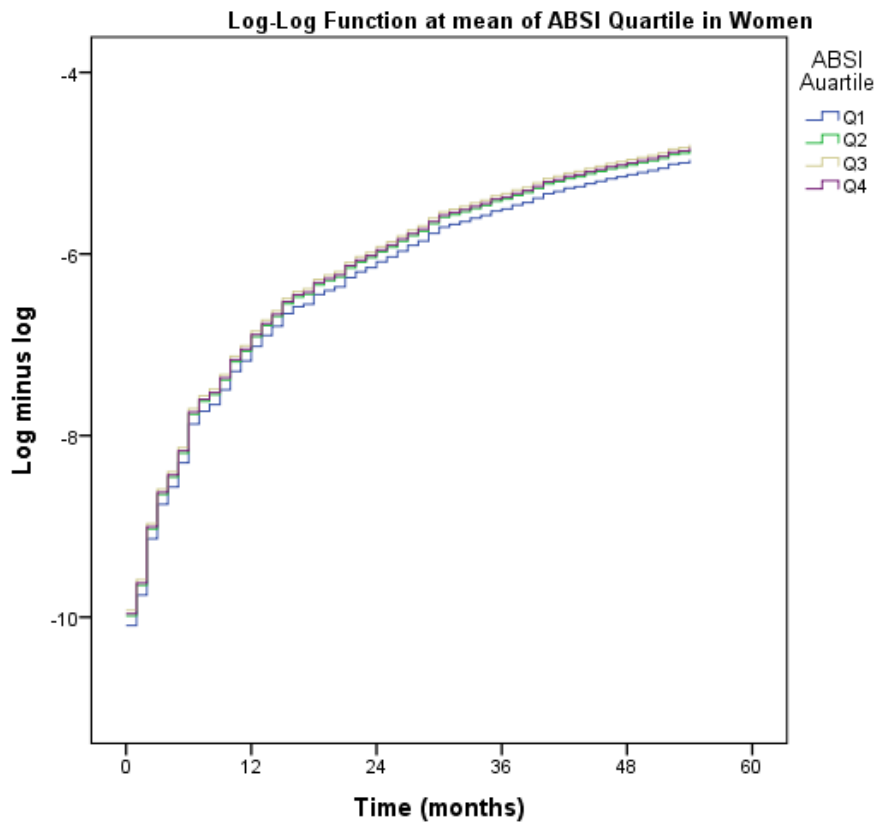

Supplement: pone.0177779.s002.pdf [file pone.0177779.s002.pdf]
